# Supplementary material for: Understanding the Gap Between Efficacy in Randomized Controlled Trials and Effectiveness in Real-World Use of GLP-1 RA and DPP-4 Therapies in Patients With Type 2 Diabetes
Source: Oxford University Press journal article supplement (doi:10.2337/dc16-2725), 2017-08-11
Supplement: dc162725supplementarydata.pdf [file dc162725supplementarydata.pdf]

# SUPPLEMENTARY DATA

**Supplemental Table 1. Included and Excluded RCTs from Drug Manufacturer Websites**

| Reference                                                                                                                                                                                                                                                                                                                                                                                                                                                       | Included (Y/N) | Reason for Exclusion |
|-----------------------------------------------------------------------------------------------------------------------------------------------------------------------------------------------------------------------------------------------------------------------------------------------------------------------------------------------------------------------------------------------------------------------------------------------------------------|----------------|----------------------|
| <b>GLP-1RA</b>                                                                                                                                                                                                                                                                                                                                                                                                                                                  |                |                      |
| <b>Liraglutide/ Victoza® (Novo Nordisk)<sup>a</sup></b>                                                                                                                                                                                                                                                                                                                                                                                                         |                |                      |
| Garber A, Henry R, Ratner R, Garcia-Hernandez PA, Rodriguez-Pattzi H, Olvera-Alvarez I, Hale PM, Zdravkovic M, Bode B, Lead Study Group: Liraglutide versus glimepiride monotherapy for type 2 diabetes (LEAD-3 Mono): a randomised, 52-week, phase III, double-blind, parallel-treatment trial. Lancet 2009;373:473-481.                                                                                                                                       | Y              |                      |
| Nauck M, Frid A, Hermansen K, Shah NS, Tankova T, Mitha IH, Zdravkovic M, During M, Matthews DR, Lead Study Group: Efficacy and safety comparison of liraglutide, glimepiride, and placebo, all in combination with metformin, in type 2 diabetes: the LEAD (liraglutide effect and action in diabetes)-2 study. Diabetes Care 2009;32:84-90.                                                                                                                   | Y              |                      |
| Marre M, Shaw J, Brandle M, Bebakar WM, Kamaruddin NA, Strand J, Zdravkovic M, Le Thi TD, Colagiuri S, Lead-Su study group: Liraglutide, a once-daily human GLP-1 analogue, added to a sulphonylurea over 26 weeks produces greater improvements in glycaemic and weight control compared with adding rosiglitazone or placebo in subjects with Type 2 diabetes (LEAD-1 SU). Diabetic medicine : a journal of the British Diabetic Association 2009;26:268-278. | Y              |                      |
| Pratley RE, Nauck M, Bailey T, Montanya E, Cuddihy R, Filetti S, Thomsen AB, Sondergaard RE, Davies M, and the Lira-Dpp Study Group: Liraglutide versus sitagliptin for patients with type 2 diabetes who did not have adequate glycaemic control with metformin: a 26-week, randomised, parallel-group, open-label trial. Lancet 2010;375:1447-                                                                                                                | Y              |                      |

## SUPPLEMENTARY DATA

1456.

Zinman B, Gerich J, Buse JB, Lewin A, Schwartz S, Raskin P, Hale PM, Zdravkovic M, Blonde L, Lead-4 Study Investigators: Efficacy and safety of the human glucagon-like peptide-1 analog liraglutide in combination with metformin and thiazolidinedione in patients with type 2 diabetes (LEAD-4 Met+ TZD). *Diabetes Care* 2009;32:1224-1230. Y

Pratley RE, Nauck M, Bailey T, Montanya E, Cuddihy R, Filetti S, Thomsen AB, Sondergaard RE, Davies M, and the Lira-Dpp Study Group: Liraglutide versus sitagliptin for patients with type 2 diabetes who did not have adequate glycaemic control with metformin: a 26-week, randomised, parallel-group, open-label trial. *Lancet* 2010;375:1447-1456.<sup>b</sup> Y

### **Exenatide/ Bydureon® (Amylin)<sup>c</sup>**

Diamant M, Van Gaal L, Stranks S, Northrup J, Cao D, Taylor K, Trautmann M: Once weekly exenatide compared with insulin glargine titrated to target in patients with type 2 diabetes (DURATION-3): an open-label randomised trial. *Lancet* 2010;375:2234-2243. Y

Blevins T, Pullman J, Malloy J, Yan P, Taylor K, Schulteis C, Trautmann M, Porter L: DURATION-5: exenatide once weekly resulted in greater improvements in glycemic control compared with exenatide twice daily in patients with type 2 diabetes. *The Journal of clinical endocrinology and metabolism* 2011;96:1301-1310. Y

|                                                                                                                                                                                                                                                                                                                                                                  |          |                                                                                                                                |
|------------------------------------------------------------------------------------------------------------------------------------------------------------------------------------------------------------------------------------------------------------------------------------------------------------------------------------------------------------------|----------|--------------------------------------------------------------------------------------------------------------------------------|
| <p>Yki-Jarvinen H, Juurinen L, Alvarsson M, Bystedt T, Caldwell I, Davies M, Lahdenpera S, Nijpels G, Vahatalo M: Initiate Insulin by Aggressive Titration and Education (INITIATE): a randomized study to compare initiation of insulin combination therapy in type 2 diabetic patients individually and in groups. <i>Diabetes Care</i> 2007;30:1364-1369.</p> | <p>N</p> | <p>Study designed to evaluate the initiation of exenatide in combination with insulin, not the addition of exenatide alone</p> |
|------------------------------------------------------------------------------------------------------------------------------------------------------------------------------------------------------------------------------------------------------------------------------------------------------------------------------------------------------------------|----------|--------------------------------------------------------------------------------------------------------------------------------|

---

### **DPP4**

## SUPPLEMENTARY DATA

### Sitagliptin/ Januvia® (Merck)<sup>d</sup>

|                                                                                                                                                                                                                                                                                                                                                                                                 |   |                                                                                                                       |
|-------------------------------------------------------------------------------------------------------------------------------------------------------------------------------------------------------------------------------------------------------------------------------------------------------------------------------------------------------------------------------------------------|---|-----------------------------------------------------------------------------------------------------------------------|
| Nauck MA, Meininger G, Sheng D, Terranella L, Stein PP, Sitagliptin Study Group: Efficacy and safety of the dipeptidyl peptidase-4 inhibitor, sitagliptin, compared with the sulfonylurea, glipizide, in patients with type 2 diabetes inadequately controlled on metformin alone: a randomized, double-blind, non-inferiority trial. <i>Diabetes, obesity &amp; metabolism</i> 2007;9:194-205. | Y |                                                                                                                       |
| Arechavaleta R, Seck T, Chen Y, Krobot KJ, O'Neill EA, Duran L, Kaufman KD, Williams-Herman D, Goldstein BJ: Efficacy and safety of treatment with sitagliptin or glimepiride in patients with type 2 diabetes inadequately controlled on metformin monotherapy: a randomized, double-blind, non-inferiority trial. <i>Diabetes, obesity &amp; metabolism</i> 2011;13:160-168.                  | Y |                                                                                                                       |
| Barzilai N, Guo H, Mahoney EM, Caporossi S, Golm GT, Langdon RB, Williams-Herman D, Kaufman KD, Amatruda JM, Goldstein BJ, Steinberg H: Efficacy and tolerability of sitagliptin monotherapy in elderly patients with type 2 diabetes: a randomized, double-blind, placebo-controlled trial. <i>Curr Med Res Opin</i> 2011;27:1049-1058.                                                        | N | elderly patients                                                                                                      |
| Goldstein BJ, Feinglos MN, Luncelford JK, Johnson J, Williams-Herman DE, Sitagliptin 036 Study Group: Effect of initial combination therapy with sitagliptin, a dipeptidyl peptidase-4 inhibitor, and metformin on glycemic control in patients with type 2 diabetes. <i>Diabetes Care</i> 2007;30:1979-1987.                                                                                   | N | Drug-naïve patients                                                                                                   |
| Raz I, Chen Y, Wu M, Hussain S, Kaufman KD, Amatruda JM, Langdon RB, Stein PP, Alba M: Efficacy and safety of sitagliptin added to ongoing metformin therapy in patients with type 2 diabetes. <i>Curr Med Res Opin</i> 2008;24:537-550.                                                                                                                                                        | N | Moderately severe type 2 diabetes (mean baseline HbA1c 9.2%)                                                          |
| Vilsboll T, Rosenstock J, Yki-Jarvinen H, Cefalu WT, Chen Y, Luo E, Musser B, Andryuk PJ, Ling Y, Kaufman KD, Amatruda JM, Engel SS, Katz L: Efficacy and safety of sitagliptin when added to insulin therapy in patients with type 2 diabetes. <i>Diabetes Obes Metab</i> 2010;12:167-177.                                                                                                     | N | Study designed to evaluate the initiation of sitagliptin in combination with insulin, not the addition of sitagliptin |

## SUPPLEMENTARY DATA

|                                                                                                                                                                                                                                                                                                                                 |   |                                                                                   |
|---------------------------------------------------------------------------------------------------------------------------------------------------------------------------------------------------------------------------------------------------------------------------------------------------------------------------------|---|-----------------------------------------------------------------------------------|
|                                                                                                                                                                                                                                                                                                                                 |   | alone                                                                             |
| Chan JC, Scott R, Arjona Ferreira JC, Sheng D, Gonzalez E, Davies MJ, Stein PP, Kaufman KD, Amatruda JM, Williams-Herman D: Safety and efficacy of sitagliptin in patients with type 2 diabetes and chronic renal insufficiency. <i>Diabetes Obes Metab</i> 2008;10:545-555.                                                    | N | Patients with renal insufficiency                                                 |
| Arjona Ferreira JC, Marre M, Barzilai N, Guo H, Golm GT, Sisk CM, Kaufman KD, Goldstein BJ: Efficacy and safety of sitagliptin versus glipizide in patients with type 2 diabetes and moderate-to-severe chronic renal insufficiency. <i>Diabetes Care</i> 2013;36:1067-1073.                                                    | N | Patients with renal insufficiency                                                 |
| Arjona Ferreira JC, Corry D, Mogensen CE, Sloan L, Xu L, Golm GT, Gonzalez EJ, Davies MJ, Kaufman KD, Goldstein BJ: Efficacy and safety of sitagliptin in patients with type 2 diabetes and ESRD receiving dialysis: a 54-week randomized trial. <i>Am J Kidney Dis</i> 2013;61:579-587.                                        | N | Patients with renal insufficiency                                                 |
| <b>Saxagliptin/ Onglyza® (AstraZeneca)<sup>e</sup></b>                                                                                                                                                                                                                                                                          |   |                                                                                   |
| DeFronzo RA, Hissa MN, Garber AJ, Gross JL, Duan RY, Ravichandran S, Chen RS, Saxagliptin 014 Study Group: The efficacy and safety of saxagliptin when added to metformin therapy in patients with inadequately controlled type 2 diabetes with metformin alone. <i>Diabetes Care</i> 2009;32:1649-1655.                        | Y |                                                                                   |
| Göke B, Gallwitz B, Eriksson J, Hellqvist Å, Gause-Nilsson I: Saxagliptin is non-inferior to glipizide in patients with type 2 diabetes mellitus inadequately controlled on metformin alone: a 52-week randomised controlled trial. <i>International journal of clinical practice</i> 2010;64:1619-1631.                        | Y |                                                                                   |
| Jadzinsky M, Pfutzner A, Paz-Pacheco E, Xu Z, Allen E, Chen R, C. V. Investigators: Saxagliptin given in combination with metformin as initial therapy improves glycaemic control in patients with type 2 diabetes compared with either monotherapy: a randomized controlled trial. <i>Diabetes Obes Metab</i> 2009;11:611-622. | N | Drug naïve patients (not previously treated with any type 2 diabetes medications) |

## SUPPLEMENTARY DATA

|                                                                                                                                                                                                                                                                |   |                                |
|----------------------------------------------------------------------------------------------------------------------------------------------------------------------------------------------------------------------------------------------------------------|---|--------------------------------|
| Nowicki M, Rychlik I, Haller H, Warren ML, Suchower L, Gause-Nilsson I, D. C. Investigators: Saxagliptin improves glycaemic control and is well tolerated in patients with type 2 diabetes mellitus and renal impairment. Diabetes Obes Metab 2011;13:523-532. | N | Patients with renal impairment |
|----------------------------------------------------------------------------------------------------------------------------------------------------------------------------------------------------------------------------------------------------------------|---|--------------------------------|

### Caption:

Abbreviations: HbA1c = glycated hemoglobin; N = no; Y = yes.

Notes:

<sup>a</sup> The website <https://www.victoapro.com/> was last searched in August 2016.

<sup>b</sup> Data from both the liraglutide and sitagliptin arms in this study were included in the current analyses.

<sup>c</sup> The website <https://www.bydureonhcp.com/> was last searched August 2016.

<sup>d</sup> The website <https://www.merckconnect.com/januvia/overview.html> was last searched August 2016.

<sup>e</sup> The website <https://www.onglyza-hcp.com/> was last searched August 2016.

## SUPPLEMENTARY DATA

**Supplemental Table 2. Diagnosis Codes**

| <b>Diagnosis</b>                | <b>ICD-9-CM</b>                              |
|---------------------------------|----------------------------------------------|
| <b>Study inclusion criteria</b> |                                              |
| Type 2 Diabetes                 | 250.x0, 250.x2                               |
| <b>Study exclusion criteria</b> |                                              |
| Type 1 Diabetes                 | 250.x1, 250.x3                               |
| Secondary Diabetes              | 249.x                                        |
| Gestational Diabetes            | 648.8                                        |
| Dementia                        | 290.x, 294.1, 331.2                          |
| Hemiplegia                      | 334.1, 342.x, 343.x, 344.0– 344.6, 344.9     |
| Metastatic Solid Tumor          | 196.x–199.x                                  |
| Liver Disease                   | 456.0–456.2, 572.2–572.8                     |
| AIDS                            | 042.x–044.x                                  |
| Malignancy                      | 140.x–172.x, 174.x–195.8, 200.x–208.x, 238.6 |

**Caption:**

Abbreviations: AIDS = acquired immune deficiency syndrome; ICD-9-CM = International Classification of Diseases, Ninth Revision, Clinical Modification.

SUPPLEMENTARY DATA

**Supplemental Table 3. Data extracted from included RCTs**

| Drug Class     | RCT, author         | Drug        | Dose   | Follow-up (weeks) | Baseline HbA1c, % | Change of HbA1c, % | Age (mean years) | Use of advanced therapy prior to randomization <sup>a</sup> , % | White, % | Male, % | Number of Patients |
|----------------|---------------------|-------------|--------|-------------------|-------------------|--------------------|------------------|-----------------------------------------------------------------|----------|---------|--------------------|
| <b>GLP-1RA</b> | Garber et al. (28)  | Liraglutide | 1.2 mg | 52                | 8.30              | -0.84              | 53.7             | 36                                                              | 80       | 47      | 246                |
|                |                     |             | 1.8 mg | 52                | 8.30              | -1.14              | 52.0             | 35                                                              | 75       | 49      | 251                |
|                | Nauck et al. (20)   | Liraglutide | 0.6 mg | 26                | 8.4               | -0.70              | 56.0             | 71                                                              | 84       | 62      | 242                |
|                |                     |             | 1.2 mg | 26                | 8.30              | -1.00              | 57.0             | 68                                                              | 88       | 54      | 240                |
|                |                     |             | 1.8 mg | 26                | 8.40              | -1.00              | 57.0             | 70                                                              | 88       | 59      | 242                |
|                | Marre et al. (25)   | Liraglutide | 0.6 mg | 26                | 8.4               | -0.60              | 55.7             | 70                                                              | N/A      | 54      | 233                |
|                |                     |             | 1.2 mg | 26                | 8.50              | -1.08              | 57.7             | 69                                                              | N/A      | 45      | 228                |
|                |                     |             | 1.8 mg | 26                | 8.50              | -1.13              | 55.6             | 73                                                              | N/A      | 53      | 234                |
|                | Pratley et al. (19) | Liraglutide | 1.2 mg | 26                | 8.40              | -1.24              | 55.9             | 0                                                               | 82       | 52      | 225                |
|                |                     |             | 1.8 mg | 26                | 8.40              | -1.50              | 55.0             | 0                                                               | 87       | 52      | 221                |
|                | Zinman et al. (29)  | Liraglutide | 1.2 mg | 26                | 8.50              | -1.50              | 55.0             | 84                                                              | 81       | 57      | 178                |
|                |                     |             | 1.8 mg | 26                | 8.60              | -1.50              | 55.0             | 84                                                              | 83       | 51      | 178                |
|                | Diamant             | Exenatide   | 2 mg   | 26                | 8.30              | -1.50              | 58.0             | 30                                                              | 82       | 52      | 228                |

# SUPPLEMENTARY DATA

|              |                           |              |        |    |      |       |      |    |    |    |     |
|--------------|---------------------------|--------------|--------|----|------|-------|------|----|----|----|-----|
|              | et al. (26)               | QW           |        |    |      |       |      |    |    |    |     |
|              | Blevins et al. (27)       | Exenatide QW | 2 mg   | 24 | 8.50 | -1.60 | 56.0 | 57 | 63 | 60 | 129 |
| <b>DPP-4</b> | Nauck et al. (20)         | Sitagliptin  | 100 mg | 52 | 7.50 | -0.67 | 56.8 | 34 | 74 | 57 | 382 |
|              | Arechaval eta et al. (32) | Sitagliptin  | 100 mg | 30 | 7.50 | -0.47 | 56.3 | 0  | 58 | 55 | 443 |
|              |                           | Saxagliptin  | 2.5 mg | 24 | 8.10 | -0.59 | 54.7 | 0  | 80 | 43 | 186 |
|              | DeFronzo et al. (31)      | Saxagliptin  | 5 mg   | 24 | 8.10 | -0.69 | 54.7 | 0  | 83 | 54 | 186 |
|              |                           | Saxagliptin  | 10 mg  | 24 | 8.00 | -0.58 | 54.2 | 0  | 80 | 53 | 180 |
|              | Göke et al. (33)          | Saxagliptin  | 5 mg   | 52 | 7.46 | -0.74 | 57.5 | 0  | 82 | 50 | 293 |
|              | Pratley et al. (19)       | Sitagliptin  | 100 mg | 26 | 8.50 | -0.90 | 55.0 | 0  | 91 | 55 | 219 |



## SUPPLEMENTARY DATA

### **Caption:**

Sources of all RCTs are listed in **Supplemental Table 1**. Last observation carried forward (LOCF) was reported in all trials, except Göke et al. (33) which removed from their analysis patients who received supplemental diabetes medications (e.g. rescue).

Abbreviations: DPP4 = dipeptidyl peptidase 4; GLP-1RA = glucagon-like peptide-1 receptor agonist; HbA1c = glycated hemoglobin; mg = milligrams; N/A = not available; RCT = randomized controlled trial; QW = once weekly.

Notes:

<sup>a</sup>Use of advanced therapy prior to randomization is defined as 100% minus the percent of patients who were only on metformin monotherapy.

<sup>b</sup>Two low dose (0.6 mg) liraglutide treatment arms were excluded.

## SUPPLEMENTARY DATA

**Supplemental Figure 1. Conceptual Framework for Comparing Randomized Trial and Real-world Data**

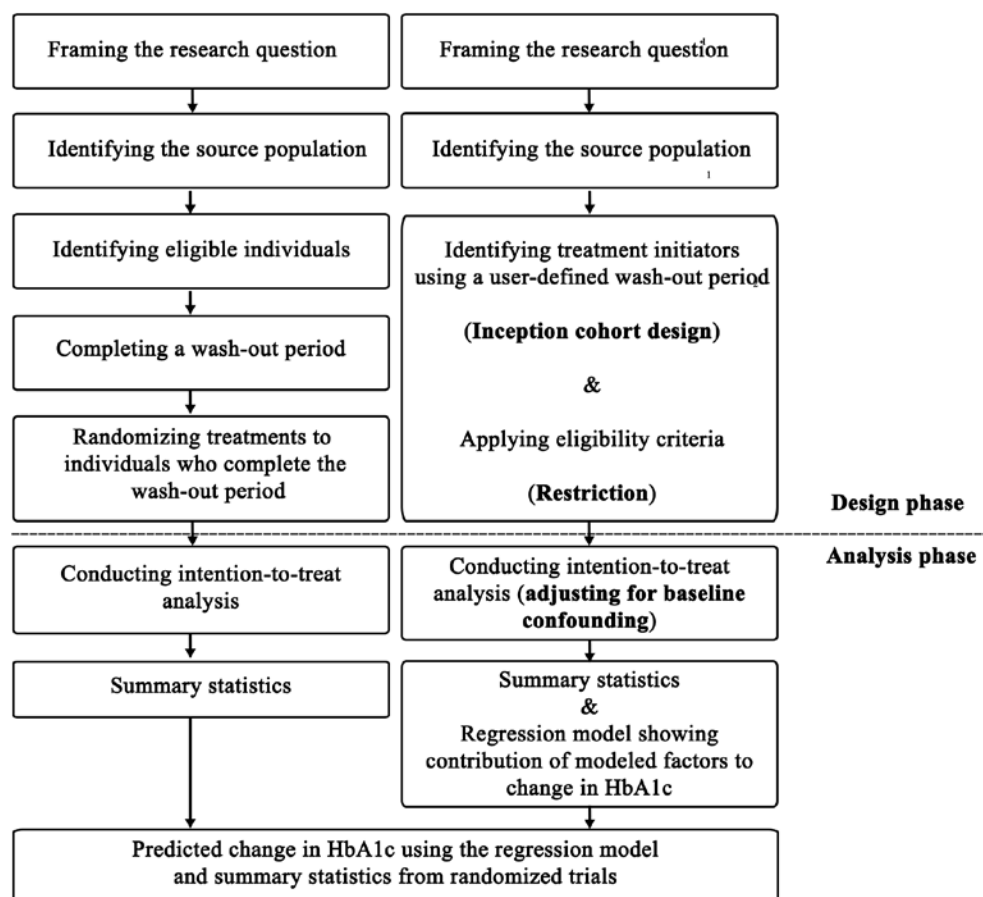

### **Legend:**

Adapted from: Toh S, Manson JE. An analytic framework for aligning observational and randomized trial data: Application to postmenopausal hormone therapy and coronary heart disease. *Stat Biosci*. Nov 01 2013;5(2). Abbreviations: HbA1c = glycated hemoglobin.

## SUPPLEMENTARY DATA

### Supplemental Figure 2. Selection of Real-World Patients with Type II Diabetes who Initiated a DPP4 Inhibitor

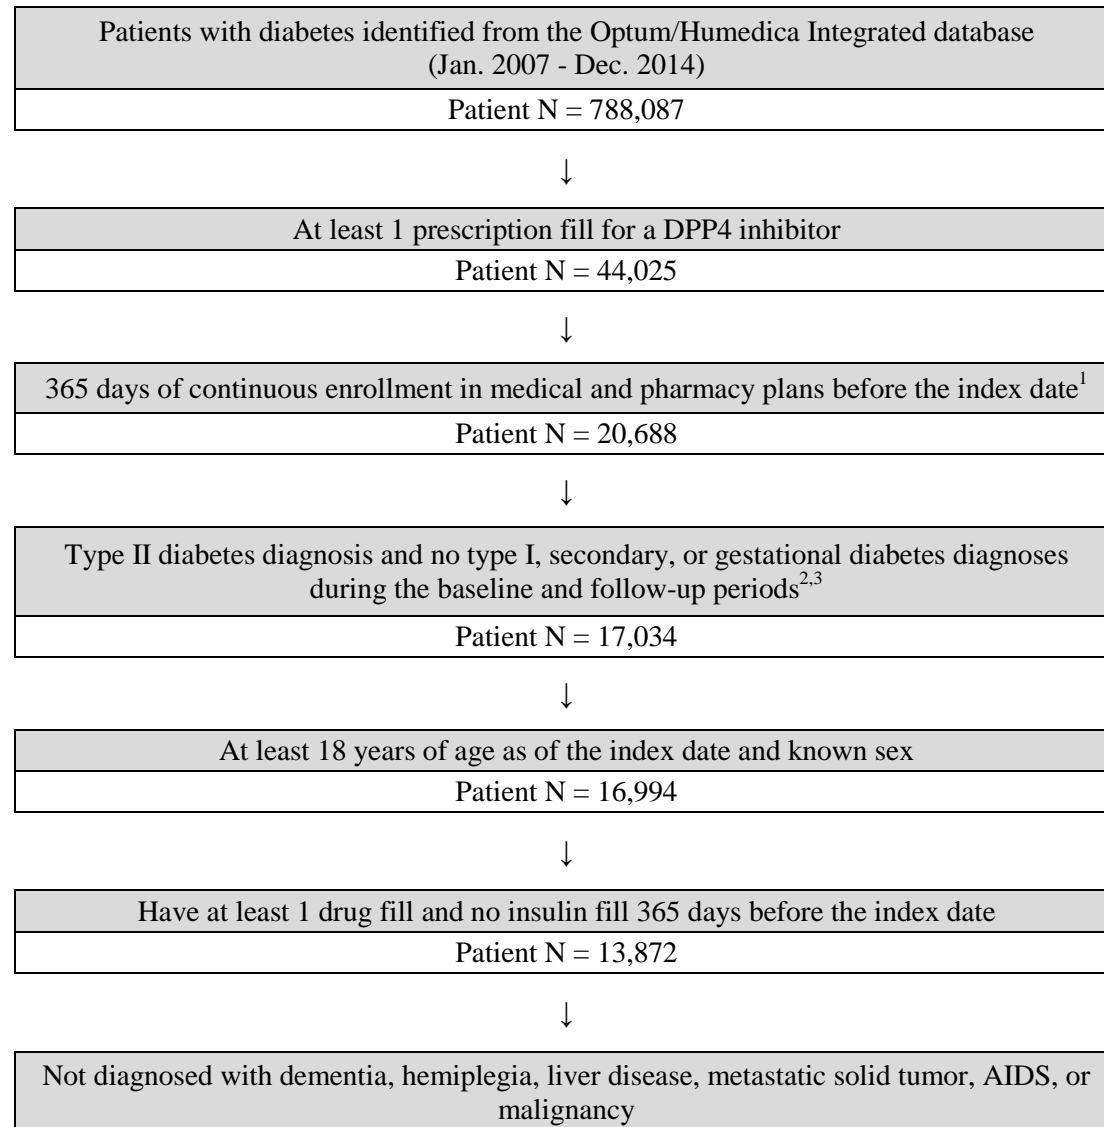

## SUPPLEMENTARY DATA

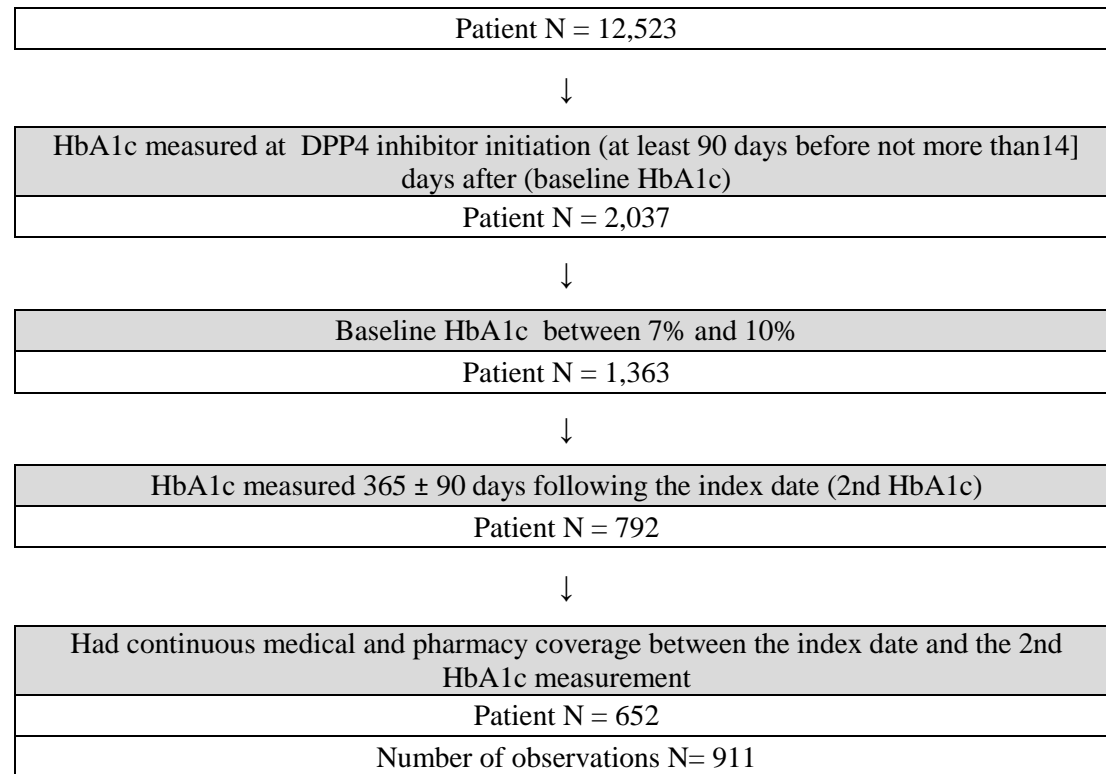

### Notes:

1. The index date is the earliest prescription fill date for a DPP4-containing diabetes medication.
2. Baseline is the 365-day period prior to the index date. Patients are followed up until the 2nd HbA1c reading, measured 365 ± 90 days following the index date.
3. Diabetes diagnoses based on ICD-9-CM diagnosis codes: 250.x0 and 250.x2 (type II), 250.x1 and 250.x3 (type I), 249.xx (secondary), 648.8 (gestational).

## SUPPLEMENTARY DATA

### Supplemental Figure 3. Selection of Real-World Patients with Type II Diabetes who Initiated a GLP-1RA

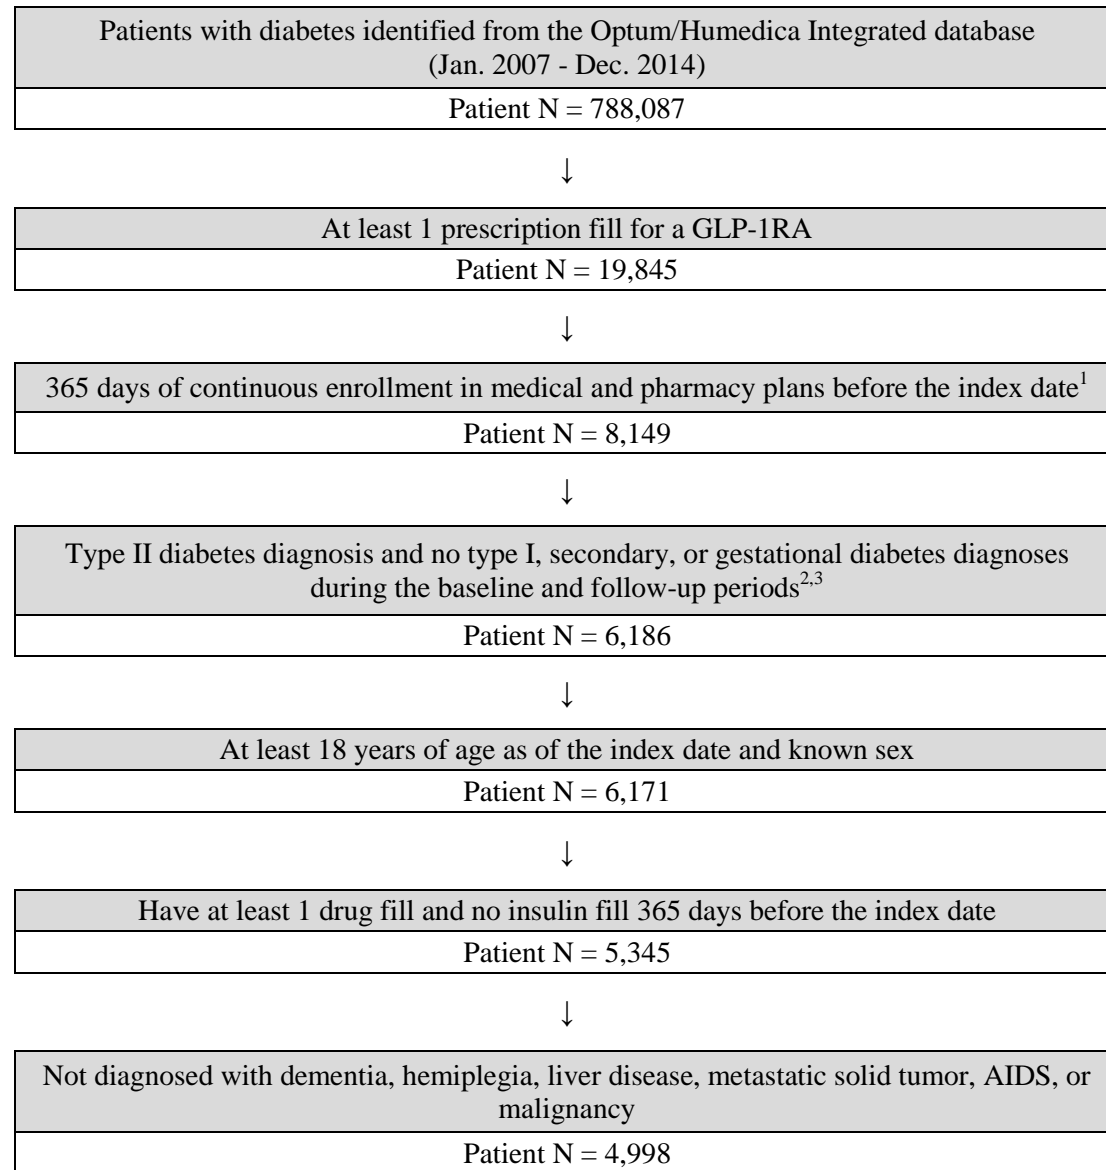

## SUPPLEMENTARY DATA

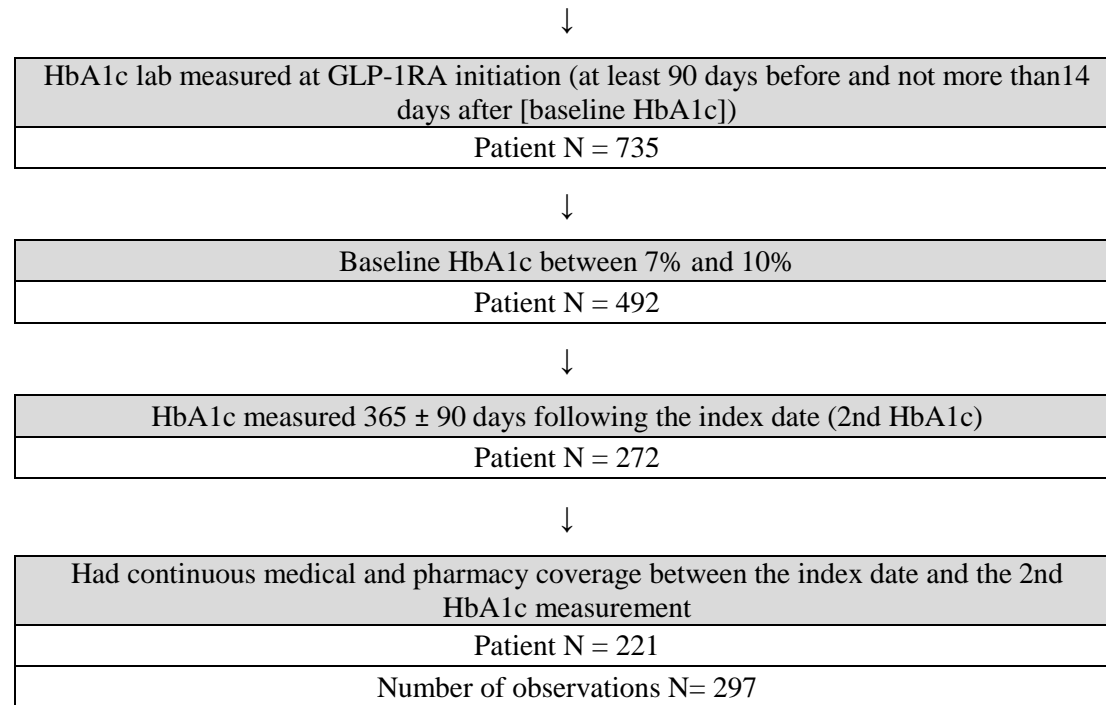

### Notes:

1. The index date is the earliest prescription fill date for a GLP-1 agonist-containing diabetes medication.
2. Baseline is the 365-day period prior to the index date. Patients are followed up until the 2nd HbA1c reading, measured 365 ± 90 days following the index date.
3. Diabetes diagnoses based on ICD-9-CM diagnosis codes: 250.x0 and 250.x2 (type II), 250.x1 and 250.x3 (type I), 249.xx (secondary), 648.8 (gestational).
